# Supplementary material for: Fluorescent histidine-derived biodynamers as biocompatible and highly water-soluble copper( ii )-sensors
Source: Royal Society of Chemistry journal article supplement (doi:10.1039/d4lp00126e), 2024-01-01
Supplement: d4lp00126e9.pdf [file d4lp00126e9.pdf]

# Supporting Information

## Fluorescent Histidine-derived Biodynamers as Biocompatible and Highly Water-Soluble Copper(II)-Sensors

*Lena Zeroug-Metz<sup>1</sup>, Mohamed A. M. Kamal<sup>2</sup>, Justine Bassil<sup>2</sup>, Kalanika Elamaldeniya<sup>3</sup>,*

*Bo Hyun Ryu<sup>3</sup>, Eric Buhler<sup>4</sup>, Sangeun Lee<sup>1,2\*</sup>*

<sup>1</sup> Pharmaceutical Materials and Processing, Department of Pharmacy,  
Saarland University, Campus C4. 1, 66123, Saarbrücken, Germany

<sup>2</sup> Helmholtz Institute of Pharmaceutical Research Saarland (HIPS) – Helmholtz Centre for  
Infection Research (HZI),  
Campus E8.1, 66123 Saarbrücken, Germany

<sup>3</sup> Korea Institute of Science and Technology Europe, Forschungsgesellschaft mbH,  
Campus E7.1, 66123 Saarbrücken, Germany

<sup>4</sup> Laboratoire Matière et Systèmes Complexes (MSC), UMR CNRS 7057,  
Université Paris Cité, Physics Department, Bâtiment Condorcet, 75013 Paris, France

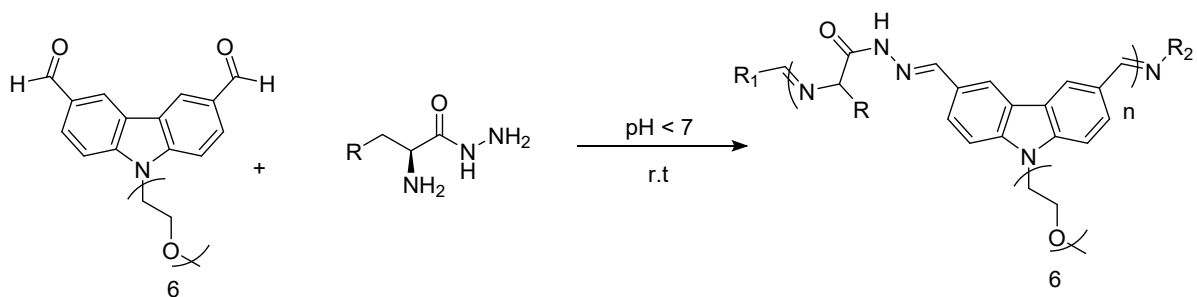

**Scheme S1.** Synthesis of amino acid-derived biodynamers.  $R_1$  represents different amino acid-derived sidechains as shown in Scheme 1.<sup>1</sup>

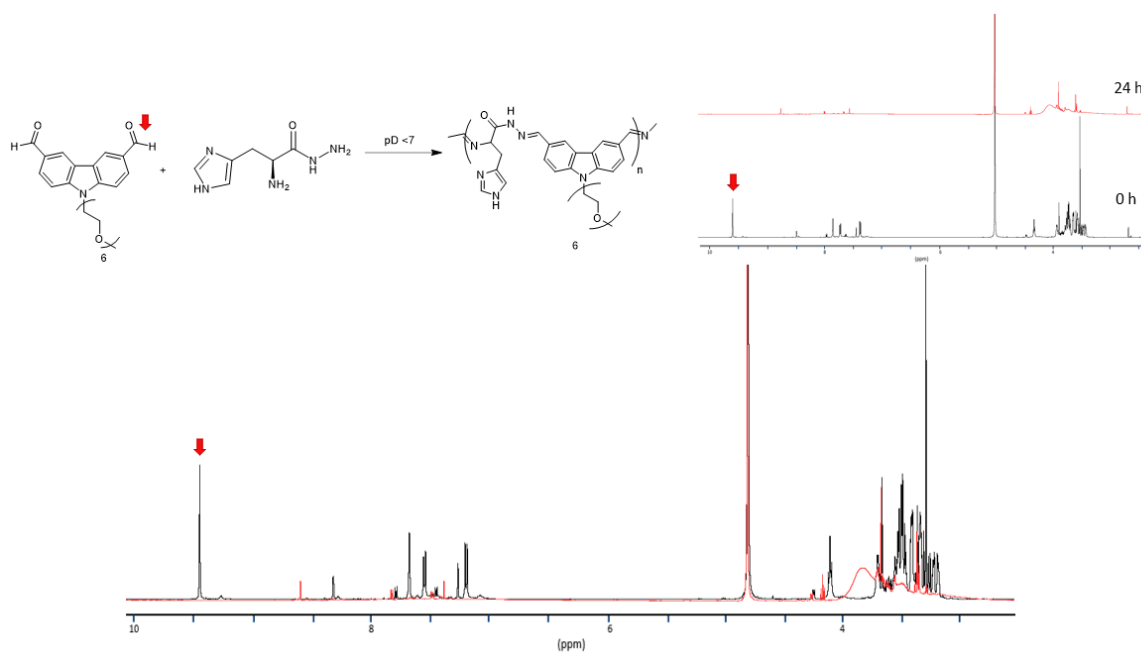

**Figure S1.** Scheme of HisBD synthesis and  $^1\text{H-NMR}$  spectrum of 10 mM HisBD (500 MHz, 10 mM d-acetate solution). The aldehyde proton peak (marked at 9.47 ppm) was monitored at reaction time 0h (black) and 24h (red).

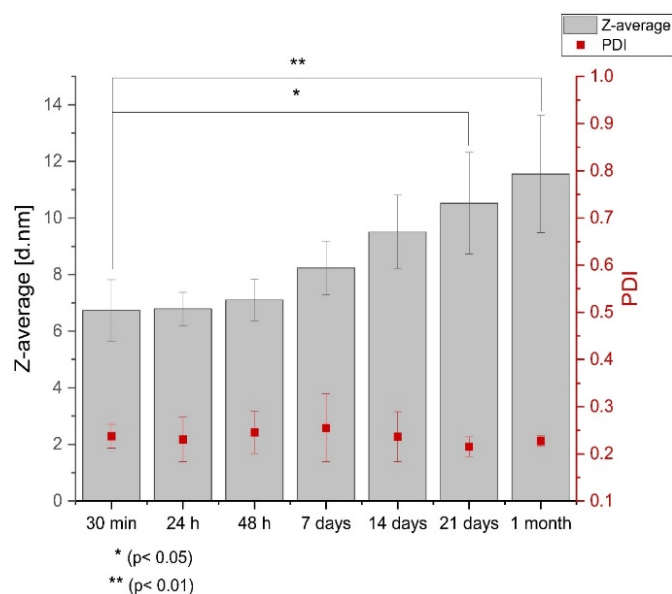

**Figure S2.** Dynamic light scattering (DLS) analysis of HisBD (10 mM) in pH 7.4 phosphate buffer (10 mM). The Z-Average and PDI were measured at different time points up to 1 month. All samples remained in solution under light exclusion and room temperature. Data represented as mean  $\pm$  SD: (n=3)

| Biodynamer | $\lambda_{abs}$ (nm) | $\lambda_{em}$ (nm) |
|------------|----------------------|---------------------|
| HisBD      | 320                  | 525                 |
| LysBD      | 320                  | 495                 |
| ArgBD      | 315                  | 460                 |
| AspBD      | 310                  | 450                 |
| GluBD      | 310                  | 455                 |

**Table S1.** Absorption ( $\lambda_{abs}$ ) and emission ( $\lambda_{em}$ ) maxima of 0.1 mM amino acid-derived biodynamers with a concentration in 10 mM pH 7.4 phosphate buffer.

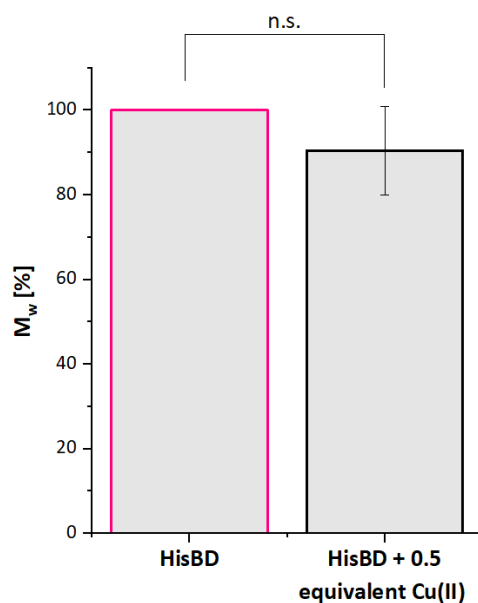

**Figure S3.** Static Light Scattering (SLS) Analysis of HisBD with and without Cu(II) in 10 mM pH 7.4 phosphate buffer (pH 7.4). The graph shows the relative molecular weight ( $M_w$ ) of HisBD in % before (pink) and after the addition of 0.5 equivalents Cu(II) (black) (in %). ANOVA analysis confirmed that the difference in  $M_w$  (%) between the samples is not significant. Data is presented as mean  $\pm$  SD: (n=3)

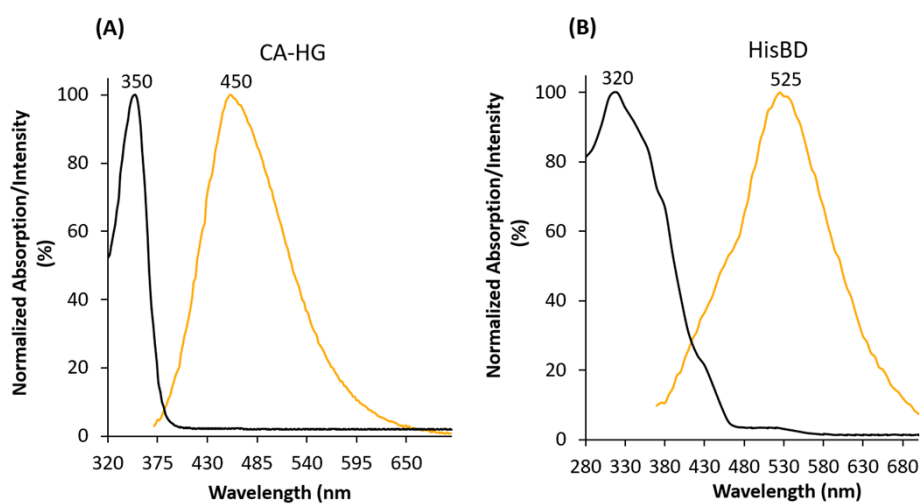

**Figure S4.** Normalized absorption (black) and emission spectra (orange) of carbazole hexaethylene glycol (A), and histidine-biodynamer (HisBD) (B).

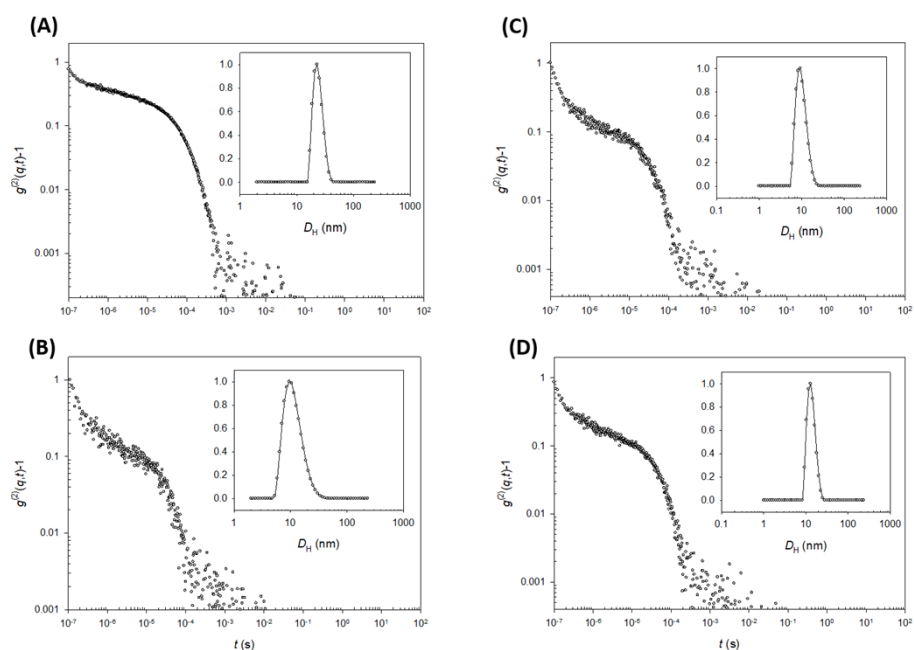

**Figure S5. (A)-(D)** DLS intensity autocorrelation function and hydrodynamic radius  $D_H$  (nm) of (A) LysBD, (B) ArgBD, (C) AspBD and (D) GluBD (1 mg/mL) at a scattering angle  $\vartheta=90^\circ$  and  $c=1$  g/L in pH 5 acetic acid buffer (100 mM). The inset represents the hydrodynamic diameter ( $D_H$ ) distribution obtained by applying the Contin method to the data.

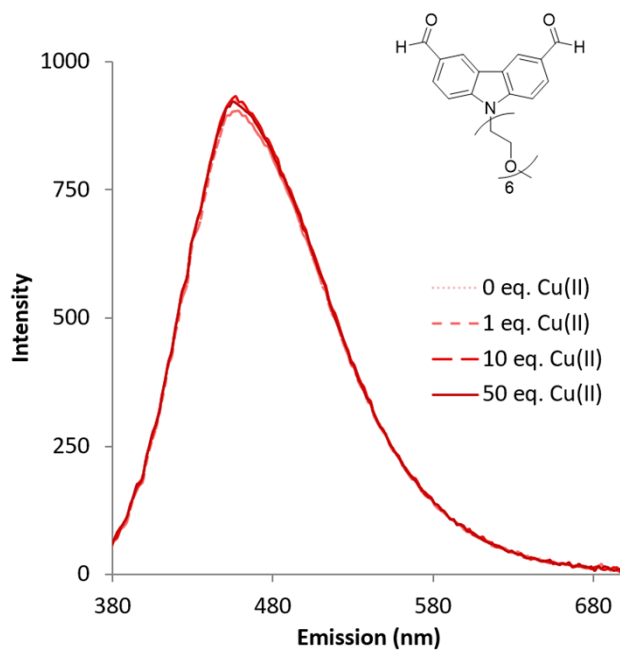

**Figures S6.** Chemical structure of the monomer CA-HG and emission spectra of CA-HG (100 mM) upon the addition of 0-50 molar equivalents Cu(II).

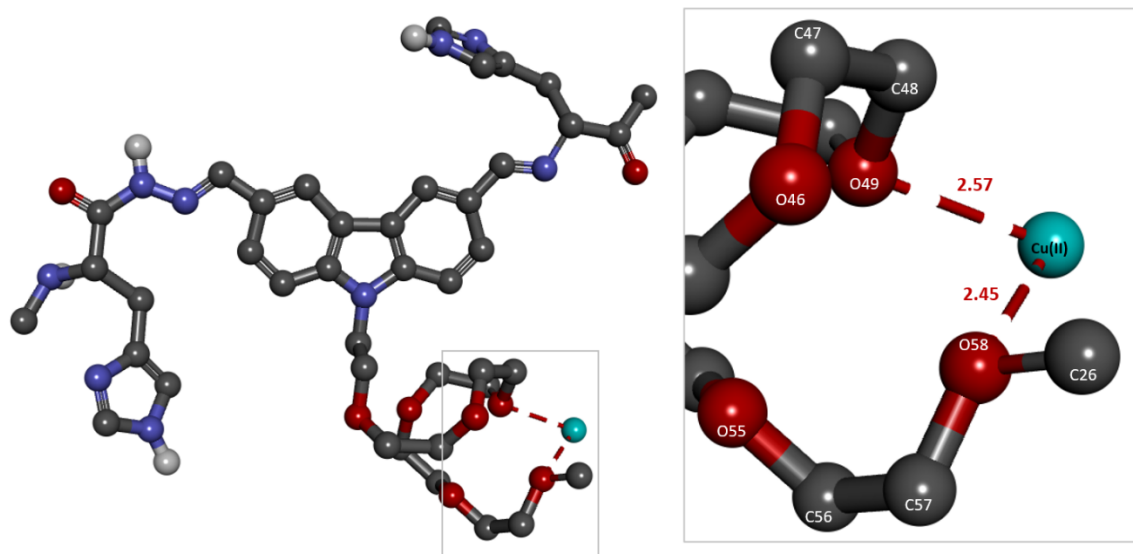

**Figure S7.** MD Autodock in silico simulation of HisBD as trimer, showing equivalent carbazole-hexaethylene glycol moiety and the Cu(II)-binding site with the numbered heteroatoms involved. The calculated binding-distances are displayed in Angstrom (Å): The simulation calculated a distance of one Copper (II) ion to HisBD of 2.4478 (O58) and 2.5676 (O49) Å with a binding free energy of -0.6 kcal/mol.

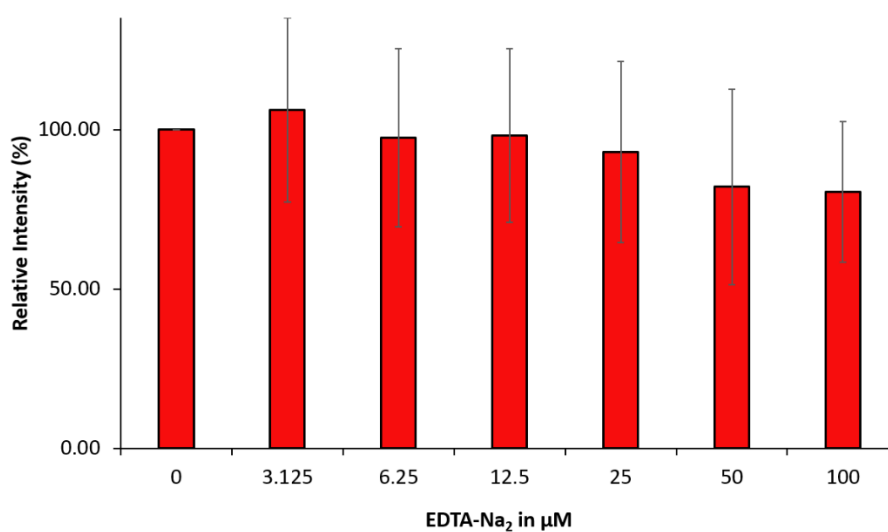

**Figure S8.** Effect of EDTA-Na<sub>2</sub> on the relative fluorescence intensity (%) of HisBD. A variety of 3.125 μM up to 100 μM EDTA-Na<sub>2</sub> was added to a stable concentration of 100 μM HisBD. Data represented as mean ± SD: (n=3)

## References

(1) Liu, Y.; Stuart, M. C. A.; Buhler, E.; Lehn, J.-M.; Hirsch, A. K. H. Proteoid Dynamers with Tunable Properties.

*Adv. Funct. Mater.* **2016**, *26* (34), 6297–6305.
