# Supplementary figures and images for: Fluorescent histidine-derived biodynamers as biocompatible and highly water-soluble copper( ii )-sensors
Source: Royal Society of Chemistry journal article supplement (doi:10.1039/d4lp00126e), 2024-01-01

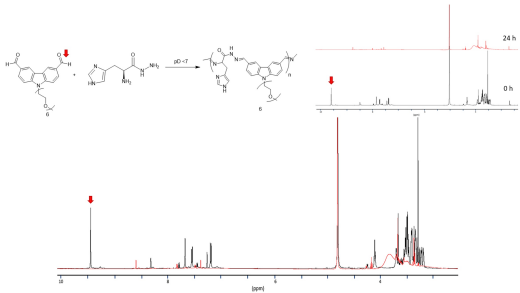

Supplement: d4lp00126e1.pdf [file d4lp00126e1.pdf]

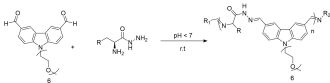

Supplement: d4lp00126e10.pdf [file d4lp00126e10.pdf]

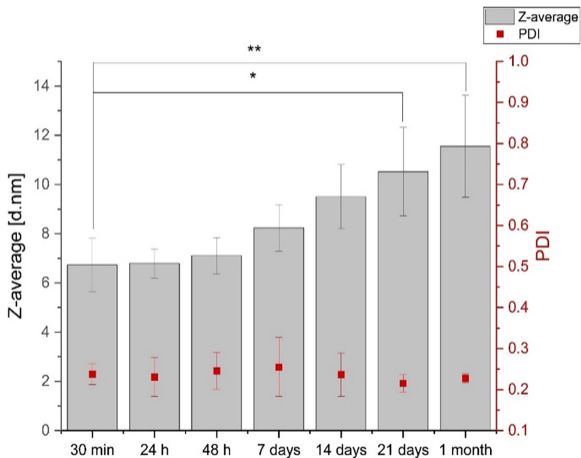

\* ( $p < 0.05$ )

\*\* ( $p < 0.01$ )

Supplement: d4lp00126e2.pdf [file d4lp00126e2.pdf]

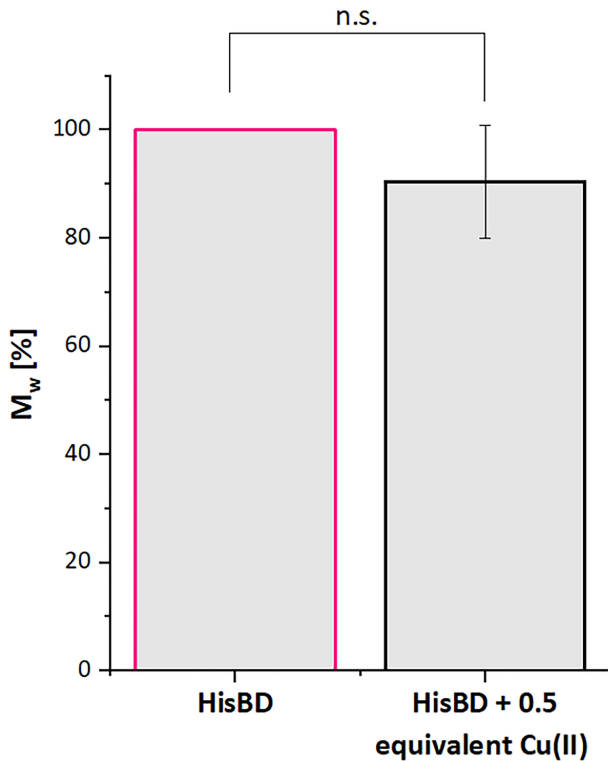

Supplement: d4lp00126e3.pdf [file d4lp00126e3.pdf]

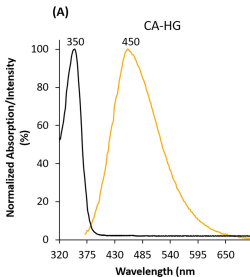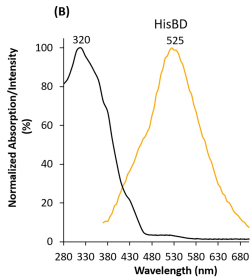

Supplement: d4lp00126e4.pdf [file d4lp00126e4.pdf]

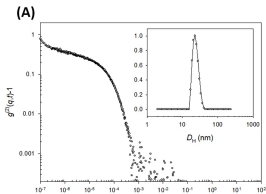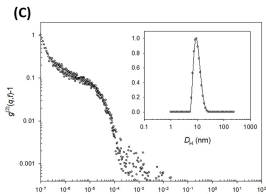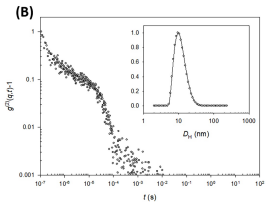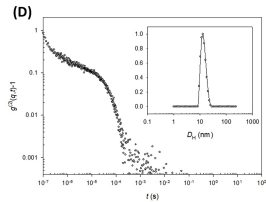

Supplement: d4lp00126e5.pdf [file d4lp00126e5.pdf]

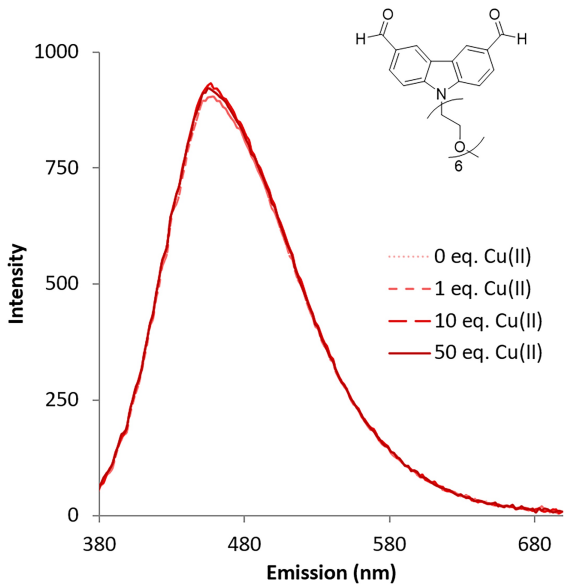

Supplement: d4lp00126e6.pdf [file d4lp00126e6.pdf]

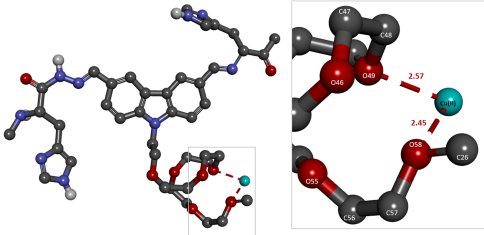

Supplement: d4lp00126e7.pdf [file d4lp00126e7.pdf]

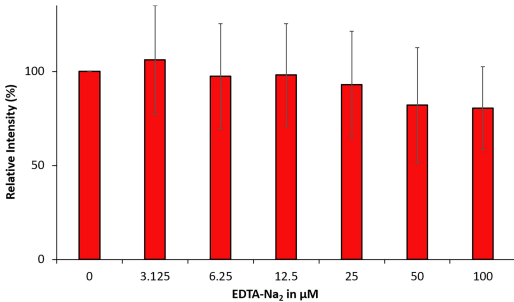

Supplement: d4lp00126e8.pdf [file d4lp00126e8.pdf]
